1 **Defensive nymphs in the water-repellent gall of the social aphid *Colophina***  
2 ***monstrifica* (Hemiptera: Aphididae: Eriosomatinae)**

3

4 Keigo Uematsu<sup>1</sup>, Shigeyuki Aoki<sup>2</sup> and Man-Miao Yang<sup>3</sup>

5

6 <sup>1</sup>*Department of Evolutionary Studies of Biosystems, SOKENDAI (the Graduate*  
7 *University for Advanced studies), 240-0193 Hayama, Japan*

8 <sup>2</sup>*Rissho University, 141-8602 Tokyo, Japan*

9 <sup>3</sup>*Department of Entomology, National Chung Hsing University, 40227 Taichung,*  
10 *Taiwan*

11

12 *Correspondence: Keigo Uematsu, Department of Evolutionary Studies of Biosystems,*  
13 *SOKENDAI (the Graduate University for Advanced studies), 240-0193 Hayama, Japan.*

14 Email: keigouematsu@gmail.com

15

16 **Abstract**

17 The aphid *Colophina monstiflora* forms woolly colonies with sterile soldiers on the  
18 secondary host *Clematis uncinata* in Taiwan. However, the gall or primary-host  
19 generation of *C. monstiflora* has not been found to date. We successfully induced galls  
20 of the species on trees of *Zelkova serrata* through attaching its eggs onto the trees, and  
21 also found a few naturally formed galls on another *Z. serrata* tree. The identity of the  
22 aphids was confirmed by examining their morphology and mitochondrial DNA  
23 sequences. First- and second-instar nymphs in the galls exhibited attacking behavior  
24 toward artificially introduced moth larvae. Observations with a scanning electron  
25 microscope revealed that the gall inner surface was densely covered with minute  
26 trichomes. This indicates the water repellency of the inner surface, and strongly  
27 suggests that young nymphs of *C. monstiflora* dispose of honeydew globules outside the  
28 gall, as known in the congener *C. clematis*.

29

30

31 **Key words:** *Clematis uncinata*, life cycle, molecular phylogeny, trichome, *Zelkova*  
32 *serrata*.

33

34 **INTRODUCTION**

35

36 Species of the aphid genus *Colophina* (Eriosomatinae; Eriosomatini) exhibit facultative  
37 host-alternation between the primary and secondary hosts. On the primary host plant,  
38 *Zelkova serrata* (Ulmaceae), a foundress (or fundatrix) forms a gall on the leaf, in  
39 which she produces offspring by parthenogenesis and young nymphs perform colony  
40 defense against intruding predators (Aoki 1980). The gall inner surface of *C. clematis* is  
41 densely covered with trichomes, which enables young nymphs to perform gall cleaning  
42 by pushing globules of honeydew out of the gall (Uematsu *et al.* 2018). This  
43 water-repellent structure can be regarded as an “extended phenotype” of the aphids in  
44 the gall (Uematsu *et al.* 2018; see also Stone & Schönrogge 2003; Kutsukake *et al.*  
45 2019). On the secondary host plants, *Clematis* spp. (Ranunculaceae), they form dense,  
46 woolly colonies, where sterile first-instar nymphs called “soldiers” perform colony  
47 defense. Sterile soldier nymphs have been found in *C. clematis* (Aoki 1977a), *C. arma*  
48 (Aoki 1977b), *C. monstiflora* (Aoki 1983) and *C. clematicola* (Akimoto 1998). Soldiers  
49 of the first three species are characterized by their enlarged fore and mid legs, with  
50 which they cling tightly to a predator and sting it with their stylets (Ijichi *et al.* 2005).

51 The gall or primary-host generation of *Colophina* has been recorded in three  
52 Japanese species, *C. clematis*, *C. arma* and *C. clematicola* (Aoki 1980; Aoki & Kurosu  
53 2000). However, galls of *Colophina* (*C. arma* and *C. clematicola* in particular) are  
54 rarely found under natural conditions, despite the fact that trees of their primary host, *Z.*  
55 *serrata*, are common in Japan (Kurosu & Aoki 1991; Aoki & Kurosu 2000). Since some  
56 young nymphs produced on the secondary host plant overwinter on buds near the  
57 ground (Aoki *et al.* 1997) or in crevices of the bark of lignified stems of *Clematis* (Aoki  
58 1977a, 1980; Blackman & Eastop 2021), the aphids can continue their life cycles  
59 without returning to the primary host. By collecting its sexuparae from the secondary  
60 host *Clematis terniflora* and transferring them to a potted tree of *Z. serrata*, Aoki and

61 Kurosu (2000) succeeded in inducing a few galls of *C. clematicola*, which had been  
62 unknown before.

63 *Colophina monstiflica* is known from mountainous areas of Taiwan (Aoki  
64 1983). The species forms dense, woolly colonies on stems of the secondary host  
65 *Clematis uncinata* (reported as “*C. floribunda*” in Aoki (1983)), an evergreen vine, and  
66 produces winged sexuparae in autumn. *Zelkova serrata* is widely distributed in  
67 mountainous areas of Taiwan, where galls of *C. clematis* are rather commonly found  
68 (Bo-Fei Chen 2007, unpublished Master Thesis, National Chung Hsing University).  
69 However, galls of *C. monstiflica* have not been found to date. Here, we report that *C.*  
70 *monstiflica* also forms galls on *Z. serrata* in Taiwan. We succeeded in inducing galls of  
71 the species on trees of *Z. serrata*, and also found a few galls under natural conditions.  
72 As in *C. clematis*, the inner surface of its galls was covered by dense trichomes. In  
73 addition, we show that first- and second-instar nymphs of *C. monstiflica* perform  
74 altruistic colony defense against intruding predators.

75

## 76 **MATERIALS AND METHODS**

77

### 78 **Collection of galls**

79 Large colonies of *Colophina monstiflica* were found on *Clematis uncinata* at Huisun  
80 Experimental Forest Station (24°05'17"N, 121°02'08"E), Nantou County, Taiwan, in  
81 November 2013. We collected many winged adults (sexuparae) from the colonies, and  
82 confined approximately 100 sexuparae in each of three clear plastic containers with  
83 bundles of bark pieces of *Z. serrata*, expecting that the sexuparae would produce  
84 sexuals and that the sexual females would lay eggs between the bark pieces. (Sexual  
85 nymphs of Eriosomatinae mature into adults without taking food.) The containers were  
86 kept outdoors. On 23 December 2013, these bark bundles were attached to three trees of  
87 *Z. serrata* at the coffee plantation of Huisun Experimental Forest Station (hereafter  
88 “Coffee Plantation”). In the following spring, on 18 and 28 April 2014, we found 12

89 galls of *C. monstiflora* formed on leaves of two of the three *Zelkova* trees (Fig. 1). We  
90 also found seven galls of *C. monstiflora* on leaves of another tree of *Z. serrata*, to which  
91 we had not attached the bark bundles, near the lodges of Huisun Experimental Forest  
92 Station (24°05'22"N, 121°02'05"E, hereafter "Lodge"). These galls were brought to the  
93 laboratory at Chung Hsing University, Taichung, and subjected to the following  
94 behavioral experiments. Three galls were preserved in 70 or 85% ethanol together with  
95 galled leaves to investigate the gall inner structure.

96

### 97 **Attacking behavior against predators**

98 To test attacking behavior of aphids inside the galls, we used young caterpillars of  
99 *Assara formosana* (Pyrilidae) found in a gall of the aphid *Ceratoglyphina styracicola* as  
100 a model predator, because caterpillars of some *Assara* species are known to prey on  
101 aphids in galls (Aoki & Kurosu 2010). One caterpillar was introduced to each of four  
102 galls of *C. monstiflora*. Ten minutes later, the galls were cut open with a razor and the  
103 caterpillars were taken out of the galls, and aphids attacking the caterpillars were  
104 observed under a dissecting microscope. We also tapped a few young nymphs in a cut  
105 gall with a fine brush, and video-recorded their reaction.

106

### 107 **Morphological examination**

108 Collected aphids, including those used in the experiment mentioned above, were  
109 preserved in 70 or 85% ethanol. Some of them were heated in 10% KOH solution,  
110 stained with acidic fuchsin or Evan's blue, dehydrated through an ethanol-xylene  
111 series, and mounted on microscope slides in balsam or Mount-Quick (Daido Sangyo).  
112 The mounted individuals were photographed using a digital camera (Nikon 1) attached  
113 to a light microscope. Some slide-mounted aphids of *C. monstiflora* used in this study  
114 are deposited as voucher specimens in the collections of Department of Entomology,  
115 National Chung Hsing University, Taichung, Taiwan.

116

117 **Gall inner structure**

118 After removing all aphids from their galls, the three gall-harboring *Z. serrata* leaves  
119 kept in ethanol were first transferred to 50% ethanol, then to FAA (formaldehyde 3.7%  
120 and acetic acid 5% in 50% ethanol), dehydrated through an ethanol series and dried.  
121 The dried samples were observed with a scanning electron microscope (SEM) and  
122 photographed. Density and length of trichomes in a 0.5 x 0.5 mm square area of the  
123 surface were measured based on the photographs using ImageJ  
124 (<https://imagej.nih.gov/ij/>). Statistical significance between the gall inner surface and  
125 the underside of the same leaf was analyzed using the linear mixed model (*lmer*  
126 function in the *lme4* package in R v. 3.3.3 (R Core Team 2017)) with gall identity  
127 treated as a random factor.

128

129 **Molecular phylogenetic analysis**

130 Total DNA was extracted from three aphids of *C. monstrifica* fixed in ethanol: one  
131 collected from an artificially induced gall, another from a natural gall, and the other  
132 from a colony on *C. uncinata*. A mitochondrial DNA fragment (ca. 1.6 kb) containing  
133 small subunit rRNA, tRNA-Val, and large subunit rRNA genes was amplified by PCR,  
134 as described in Aoki *et al.* (2018), and sequenced. The DNA sequences are deposited in  
135 the DNA Data Bank of Japan (DDBJ) (accession no. LC626871). These DNA  
136 sequences and those of *C. clematis* (DDBJ/EMBL/GenBank accession no. AF275224.1)  
137 and *Eriosoma lanigerum* (accession no. NC\_033352.1) were subjected to molecular  
138 phylogenetic analyses. *Ceratovacuna nekoashi* (Hormaphidinae, Cerataphidini) was  
139 used as an outgroup (accession no. AB035879.1). Multiple alignment of the nucleotide  
140 sequences was generated using MAFFT (Kato & Standley 2013). The GTR+I+G  
141 model was selected as the nucleotide substitution model using the program jModelTest2  
142 (Darriba *et al.* 2012) based on AIC. A maximum likelihood phylogenetic tree was  
143 generated using RAxML (Stamatakis 2014). Bootstrap tests were performed with 1,000  
144 replications.

145

## 146 **RESULTS**

147

### 148 **Galls of *C. monstiflora***

149 Twelve globular galls (Fig. 1) were formed on the leaf of two *Z. serrata* trees, to which  
150 the bark bundles with eggs of *C. monstiflora* had been tied in the previous December.  
151 No galls were found on other *Z. serrata* trees, to which the bark bundles had not been  
152 tied, in Coffee Plantation.

153 A few galls were also found on a tree of *Z. serrata* in Lodge, near the  
154 collection site of the free-living colonies on *C. uncinata*. There was no difference in  
155 shape between the experimentally induced galls and the natural galls. The long distance  
156 from the tree to Coffee Plantation (about 2.2 km away in a straight line) and its close  
157 proximity to the colonies on *C. uncinata* (about 180 m away) suggest that these galls  
158 were formed naturally, possibly by grandoffspring of the sexuparae which had flown  
159 from colonies on the nearby secondary host plants.

160

### 161 **Colony composition**

162 Table 1 shows the composition of inhabitants for nine galls of *C. monstiflora*. The  
163 collected galls contained a high proportion of first- and second-instar young nymphs,  
164 and a small number of nymphs with wing buds, but no winged adults. All foundresses  
165 survived and still contained embryos inside.

166

### 167 **Attacking behavior**

168 When tapped with a fine brush, young nymphs in the gall exhibited an aggressive  
169 response by clutching the brush using their forelegs (Movie S1). To test their attacking  
170 response to predators, a caterpillar of *A. formosana* was introduced into four galls (Galls  
171 #5, 6, 7, 9 in Table 1). One to five (average = 2.25) first-instar nymphs and one to six  
172 (average = 2.7) second-instar nymphs clung onto the caterpillar and stung it with their

173 stylets (Fig. 2). We confirmed under a dissecting microscope that their stylets were  
174 inserted in the body of the caterpillar, and their claws penetrated the skin. Thirty  
175 minutes later, all four caterpillars were completely immobilized.

176

### 177 **Morphology of gall inhabitants**

178 Among the gall inhabitants of *C. monstifrica*, the first- and second-instar nymphs (Fig.  
179 3) had well-developed fore and mid legs with large, strongly curved claws. In particular,  
180 fore and mid legs of the first-instar nymphs were distinctly thickened (Fig. 3a). As in *C.*  
181 *clematis* and *C. arma* (Aoki 1980), the first-instar nymphs (Fig. 3a) were discriminated  
182 from the second-instar nymphs (Fig. 3b) by the long, usually capitate dorsoapical setae  
183 on the second segment of each tarsus, and by the lack of short, spine-like seta (sense  
184 peg) on the first tarsal segment. No remarkable morphological differences were  
185 observed between attacking and non-attacking individuals, indicating that the first- and  
186 second-instar nymphs are monomorphic defenders.

187         These gall inhabitants were morphologically distinguishable from the primary  
188 host generation of *C. clematis*, which has been the only known *Colophina* species that  
189 forms a globular gall on the leaf of *Z. serrata* in Taiwan. The first-instar nymphs of *C.*  
190 *monstifrica* had a pair of small, half ring-like cornicles on the flat tergite (Fig. 4c),  
191 whereas the first instar nymphs of *C. clematis* have distinctly protruded cornicles (Fig.  
192 4d). In addition, the apex of each antenna was rounded in the first instar nymphs of *C.*  
193 *monstifrica* (Fig. 4a), while the apex is conical in those of *C. clematis* (Fig. 4b).

194

### 195 **Molecular phylogenetic analysis**

196 The DNA sequences (1,579 bp) of the three individuals of *C. monstifrica* (collected  
197 from an artificially induced gall, from a natural gall, and from a colony on *C. uncinata*)  
198 were completely identical with each other. The molecular phylogenetic analysis  
199 including other eriosomatine aphids also showed that the three samples were clearly  
200 distinct from *C. clematis* (Fig. 5), confirming our identification of *C. monstifrica*.



201

## 202 **Trichomes on the inner surface of galls**

203 The observations using an SEM revealed that the inner surface of the galls of *C.*  
204 *monstrifica* was densely covered with tiny trichomes (Fig. 6). The trichome density was  
205  $298.3 \pm 44.7 / \text{mm}^2$  ( $n = 12$ ), which was significantly higher than the trichome density  
206 on the underside of the same leaf ( $16.7 \pm 3.7 / \text{mm}^2$ ) ( $n = 12$ ,  $\chi^2 = 74.7$ ,  $df = 1$ ,  $P <$   
207  $0.001$ ). On the other hand, trichomes on the inner surface of the galls were  $82.2 \pm 30.0$   
208  $\mu\text{m}$  ( $n = 30$ ) in length and shorter than those on the underside of the leaf, which were  
209  $105.0 \pm 45.3 \mu\text{m}$  ( $n = 30$ ,  $\chi^2 = 4.97$ ,  $df = 1$ ,  $P = 0.026$ ). The high trichome density on the  
210 gall inner surface was comparable to that of *C. clematis* ( $221.7$  trichomes /  $\text{mm}^2$  on  
211 average) found in a previous study (Uematsu *et al.* 2018).

212

## 213 **DISCUSSION**

214

215 We collected naturally occurring and artificially induced galls of *C. monstrifica* on  
216 *Zelkova serrata* in Taiwan, and confirmed the identity of aphids in the galls by  
217 subsequent morphological and molecular analyses. The aphids were distinct in  
218 morphology from *C. clematis*, the only congener known in Taiwan. The molecular  
219 analyses also revealed the identity of the mitochondrial DNA sequences between the  
220 aphids in these galls on *Z. serrata* and those collected from the secondary host *Clematis*  
221 *uncinata*. Although migration of winged adults from the gall to *C. uncinata* has not  
222 been observed, these results indicate that, like other *Colophina* species, *C. monstrifica*  
223 has a life cycle with host alternation between *Zelkova* and *Clematis*. We found colonies  
224 of *C. monstrifica* on *C. uncinata* at Huisun Experimental Forest Station also on 28  
225 March 2011. This indicates that the host alternation of *C. monstrifica* is facultative, or  
226 that its colonies can persist on the clematis throughout the year.

227 We confirmed that first- and second-instar nymphs of *C. monstrifica* attack  
228 predators introduced in their gall. Their attack using the claws and stylets can

229 immobilize and kill such potential predators as pyralid larvae. In addition, we showed  
230 that the inner surface of galls of *C. monstiflora* was densely covered with minute  
231 trichomes. The galls of *C. clematis* and *C. arma* also have dense trichomes on the inner  
232 surface. It is known that these trichomes collect wax particles produced by aphids, make  
233 the inner surface water repellent and facilitate the formation of small globules of  
234 honeydew covered with the wax. Young nymphs of *C. clematis* actively dispose of  
235 honeydew globules outside their gall through a small opening (Uematsu *et al.* 2018).  
236 Although we did not directly observe honeydew-disposing behavior in this species, the  
237 microstructure of the inner surface of the gall strongly suggests that young nymphs of *C.*  
238 *monstiflora* also dispose of honeydew globules.

239         There are many species of Eriosomatinae and Hormaphidinae whose gall or  
240 primary-host generations are unknown (Blackman & Eastop 2021). It is not clear  
241 whether these species lost their primary-host generations irreversibly or still retain the  
242 ability to induce galls on the primary host. In this study, we obtained eggs of *C.*  
243 *monstiflora* by collecting sexuparae from the secondary host, attached them to its  
244 presumed primary host, and successfully induced galls of the species, which had been  
245 unknown before. This method may be applied to other species for elucidating their life  
246 cycles.

247

## 248 **ACKNOWLEDGMENTS**

249 We thank Utako Kurosu for her advice on how to collect eggs of *Colophina* spp., and  
250 Wan-Zon Yang for offering us a sample of *Colophina clematis*. We also thank Chun-I  
251 Chiu, Yi-Chuan Lee, and Sheng-Feng Lin, and Chang-Ti Tang for their help during the  
252 survey. K. U. was supported by the Sumitomo Foundation (130972) and JSPS Overseas  
253 Research Fellowships (24-596). The collection of aphids at Huisun Experimental Forest  
254 Station was permitted by the Experimental Forest Management Office, NCHU (nos.  
255 1020000228 and 1030000107).

256

257 **REFERENCES**

- 258 Akimoto S (1998) Soldier-like nymphs in the pemphigid aphid *Colophina clematicola*  
259 (Pemphigidae: Aphidoidea). *Entomological Science* **1**, 33–36.
- 260 Aoki S (1977a) *Colophina clematis* (Homoptera, Pemphigidae), an aphid species with  
261 “soldiers.” *Kontyû* **45**, 276–282.
- 262 Aoki S (1977b) A new species of *Colophina* (Homoptera, Aphidoidea) with soldiers.  
263 *Kontyû* **45**, 333–337.
- 264 Aoki S (1980) Life cycles of two *Colophina* aphids (Homoptera, Pemphigidae)  
265 producing soldiers. *Kontyû* **48**, 464–476.
- 266 Aoki S (1983) A new Taiwanese species of *Colophina* (Homoptera, Aphidoidea)  
267 producing large soldiers. *Kontyû* **51**, 282–288.
- 268 Aoki S, Kurosu U (2000) Hitherto unknown galls of the aphid *Colophina clematicola*  
269 (Homoptera) experimentally induced on leaves of *Zelkova serrata*. *Entomological*  
270 *Science* **3**, 481–486.
- 271 Aoki S, Kurosu U (2010) A review of the biology of Cerataphidini (Hemiptera,  
272 Aphididae, Hormaphidinae), focusing mainly on their life cycles, gall formation,  
273 and soldiers. *Psyche* **2010**, Article ID 380351, 34 pages.  
274 <https://doi.org/10.1155/2010/380351>
- 275 Aoki S, Kurosu U, Usuba S (1997) Overwintering of the aphid *Colophina clematicola*  
276 (Homoptera, Aphididae) on *Clematis terniflora*. *Rostria* **46**, 43–44.
- 277 Aoki S, Kurosu U, Uematsu K, Fukatsu T, Kutsukake M (2018) *Dermaphis*  
278 *coccidiformis* sp. nov. (Hemiptera), an aphid species with asymmetrically  
279 sclerotized apterae and “winter alates.” *Entomological Science* **21**, 142–153.  
280 <https://doi.org/10.1111/ens.12290>
- 281 Blackman RL, Eastop VF (2021) *Aphids on the World's Plants: An Online*  
282 *Identification and Information Guide* [cited 22 Apr 2021]. Available from URL:  
283 <http://www.aphidsonworldsplants.info>

- 284 Darriba D, Taboada GL, Doallo R, Posada D (2012) JModelTest 2: More models, new  
285 heuristics and parallel computing. *Nature Methods* **9**, Article ID 772.  
286 <https://doi.org/10.1038/nmeth.2109>
- 287 Ijichi N, Shibao H, Miura T, Matsumoto T, Fukatsu T (2005) Comparative analysis of  
288 caste differentiation during embryogenesis of social aphids whose soldier castes  
289 evolved independently. *Insectes Sociaux* **52**, 177–185.  
290 <https://doi.org/10.1007/s00040-004-0792-7>
- 291 Katoh K, Standley DM (2013) MAFFT multiple sequence alignment software version  
292 7: improvements in performance and usability. *Molecular Biology and Evolution*  
293 **30**, 772–780.
- 294 Kurosu U, Aoki S (1991) Why are aphid galls so rare? *Evolutionary Theory* **10**, 85–99.
- 295 Kutsukake M, Uematsu K, Fukatsu T (2019) Plant manipulation by gall-forming social  
296 aphids for waste management. *Frontiers in Plant Science* **10**, Article ID 933.  
297 <https://doi.org/10.3389/fpls.2019.00933>
- 298 R Core Team (2017) R: A Language and Environment for Statistical Computing. R  
299 Foundation for Statistical Computing, Vienna. Available from URL:  
300 <https://www.R-project.org/>
- 301 Stamatakis A (2014) RAxML version 8: a tool for phylogenetic analysis and  
302 post-analysis of large phylogenies. *Bioinformatics* **30**, 1312–1313.  
303 <https://doi.org/10.1093/bioinformatics/btu033>
- 304 Stone GN, Schönrogge K (2003) The adaptive significance of insect gall morphology.  
305 *Trends in Ecology and Evolution* **18**, 512–522.  
306 [https://doi.org/10.1016/S0169-5347\(03\)00247-7](https://doi.org/10.1016/S0169-5347(03)00247-7)
- 307 Uematsu K, Kutsukake M, Fukatsu T (2018) Water-repellent plant surface structure  
308 induced by gall-forming insects for waste management. *Biology Letters* **14**, Article  
309 ID 20180470. <https://doi.org/10.1098/rsbl.2018.0470>

310

311 **SUPPORTING INFORMATION**

312

313 Additional Supporting Information may be found online in the Supporting Information  
314 section at the end of the article.

315 **Movie S1.** Attacking behavior of young nymphs of *Colophina monstifica* toward a fine  
316 brush in a cut gall.

317

318

319

320 **Figure legends**

321

322 **Figure 1** A gall of *Colophina monstiflica* formed on a leaf of *Zelkova serrata*.

323

324 **Figure 2** Young nymphs of *Colophina monstiflica* attacking a larva of the moth *Assara*  
325 *formosana* introduced into their gall.

326

327 **Figure 3** Gall generation of *Colophina monstiflica*: (a) first-instar nymph (from a gall  
328 collected on 18 April 2014); (b) second-instar nymph (from a gall collected on 28 April  
329 2014). Scale bars represent 100  $\mu\text{m}$ .

330

331 **Figure 4** First-instar nymphs of *Colophina monstiflica* and *C. clematis* produced in the  
332 galls on *Zelkova serrata*: (a) apical antennal segments of *C. monstiflica*; (b) apical  
333 antennal segments of *C. clematis*; (c) posterior abdominal tergites of *C. monstiflica*; (d)  
334 posterior abdominal tergites of *C. clematis*. The right cornicle is indicated by an arrow  
335 in (c) and (d). The photographed nymphs (a, c) of *C. monstiflica* were collected on 18  
336 April 2014, and the photographed nymph (b, d) of *C. clematis* was collected in Miaoli,  
337 Taiwan, on 15 May 2002. Scale bars represent 100  $\mu\text{m}$ .

338

339 **Figure 5** Molecular phylogenetic analysis of eriosomatine aphid species. The maximum  
340 likelihood phylogeny inferred from aligned 1,572 nucleotide sites of the mitochondrial  
341 rRNA gene is shown. Bootstrap probability in percentage is shown at the nodes. The  
342 DDBJ/EMBL/GenBank accession number for each DNA sequence is indicated in  
343 square brackets.

344

345 **Figure 6** Trichomes on the inner surface of a gall of *Colophina monstiflica*. Scale bar  
346 represents 200  $\mu\text{m}$ .

347

Fig. 1

bioRxiv preprint doi: <https://doi.org/10.1101/2021.05.20.443943>; this version posted May 21, 2021. The copyright holder for this preprint (which was not certified by peer review) is the author/funder, who has granted bioRxiv a license to display the preprint in perpetuity. It is made available under a [CC-BY-NC-ND 4.0 International license](#).

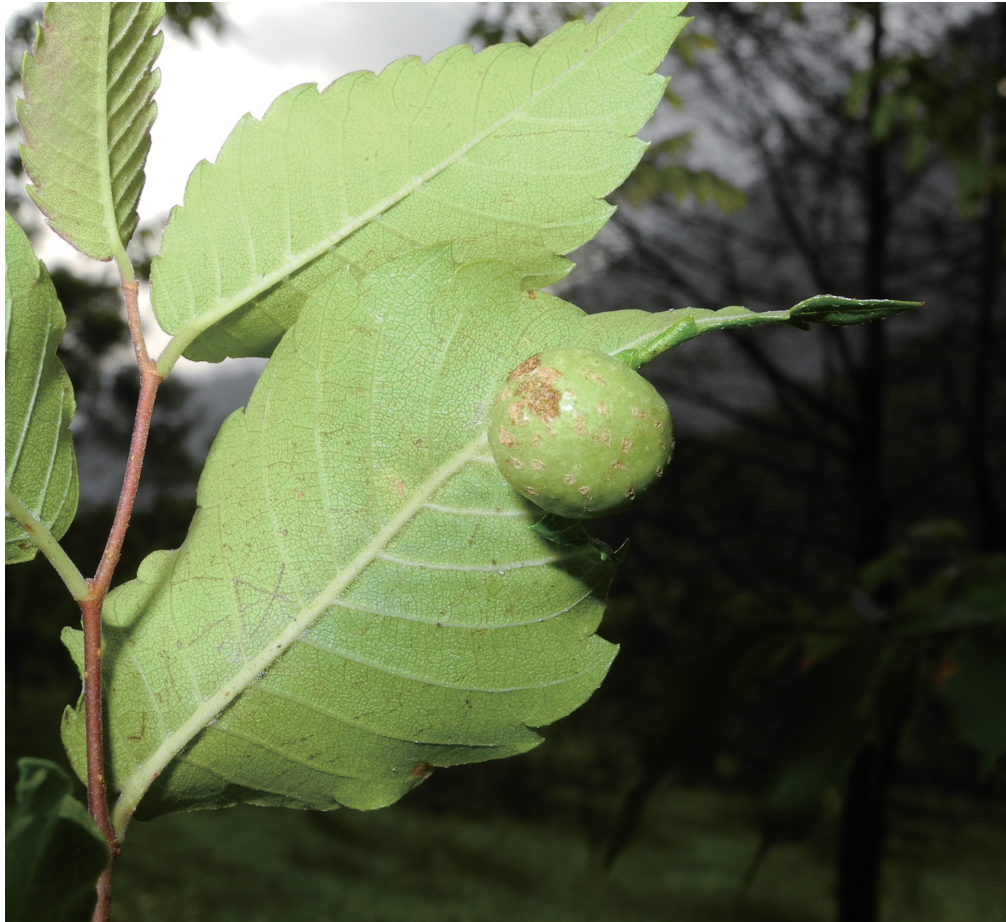

Fig. 2

bioRxiv preprint doi: <https://doi.org/10.1101/2021.05.20.443943>; this version posted May 21, 2021. The copyright holder for this preprint (which was not certified by peer review) is the author/funder, who has granted bioRxiv a license to display the preprint in perpetuity. It is made available under a [CC-BY-NC-ND 4.0 International license](#).

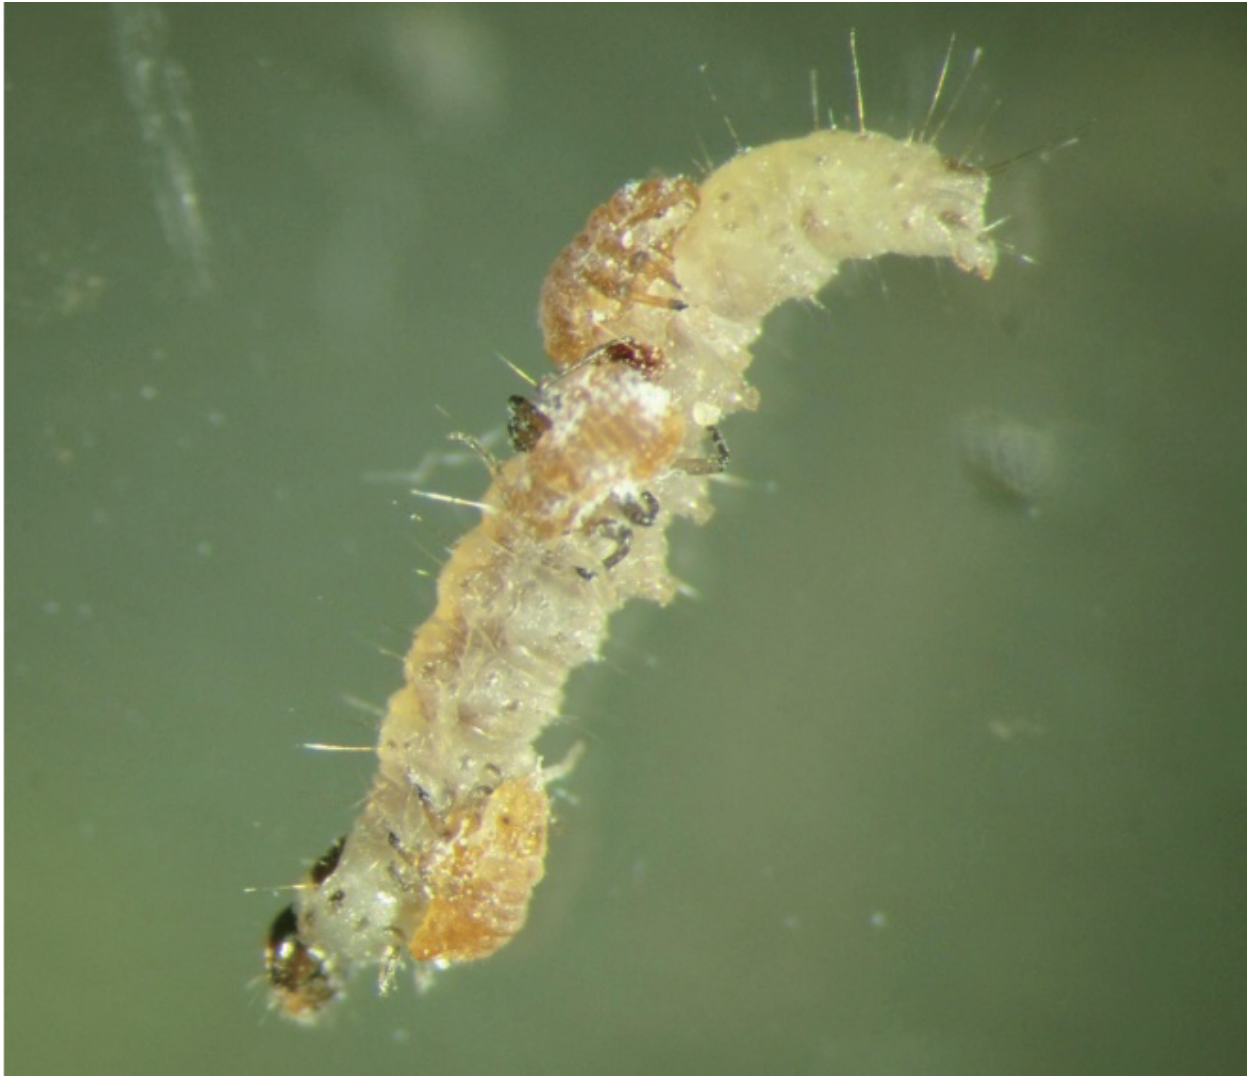



Fig. 3

bioRxiv preprint doi: <https://doi.org/10.1101/2021.05.20.443943>; this version posted May 21, 2021. The copyright holder for this preprint (which was not certified by peer review) is the author/funder, who has granted bioRxiv a license to display the preprint in perpetuity. It is made available under a [CC-BY-NC-ND 4.0 International license](#).

(a)

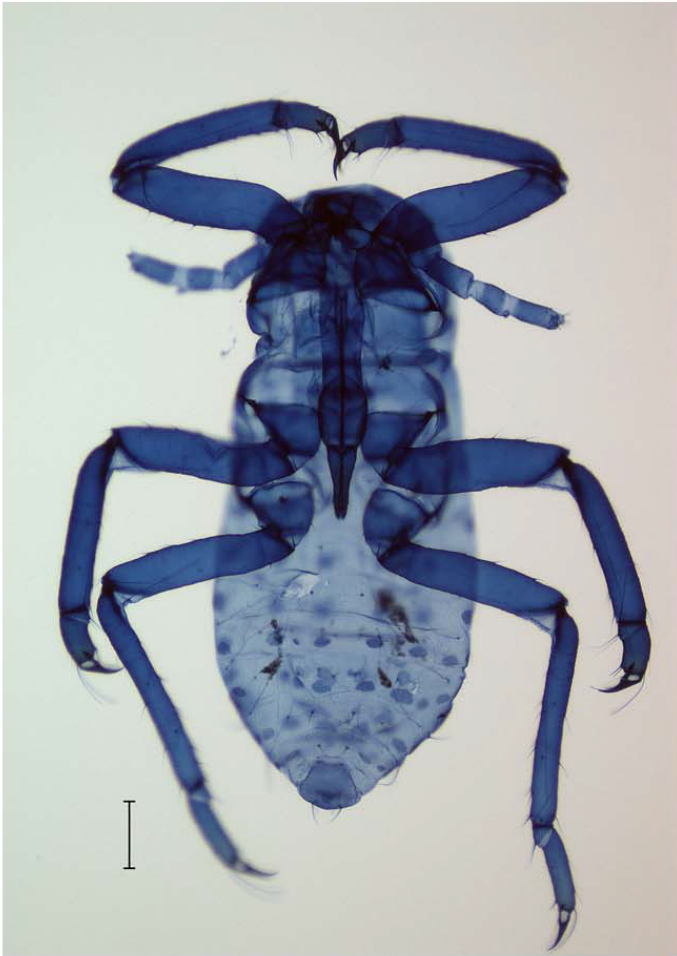

(b)

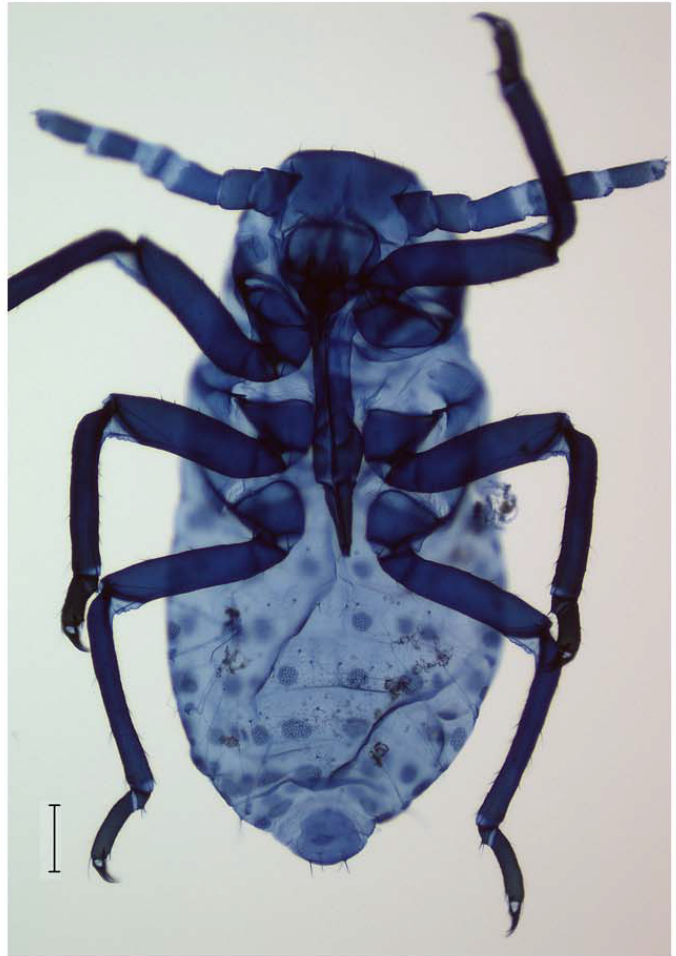

Fig. 4

bioRxiv preprint doi: <https://doi.org/10.1101/2021.05.20.443943>; this version posted May 21, 2021. The copyright holder for this preprint (which was not certified by peer review) is the author/funder, who has granted bioRxiv a license to display the preprint in perpetuity. It is made available under a [CC-BY-NC-ND 4.0 International license](#).

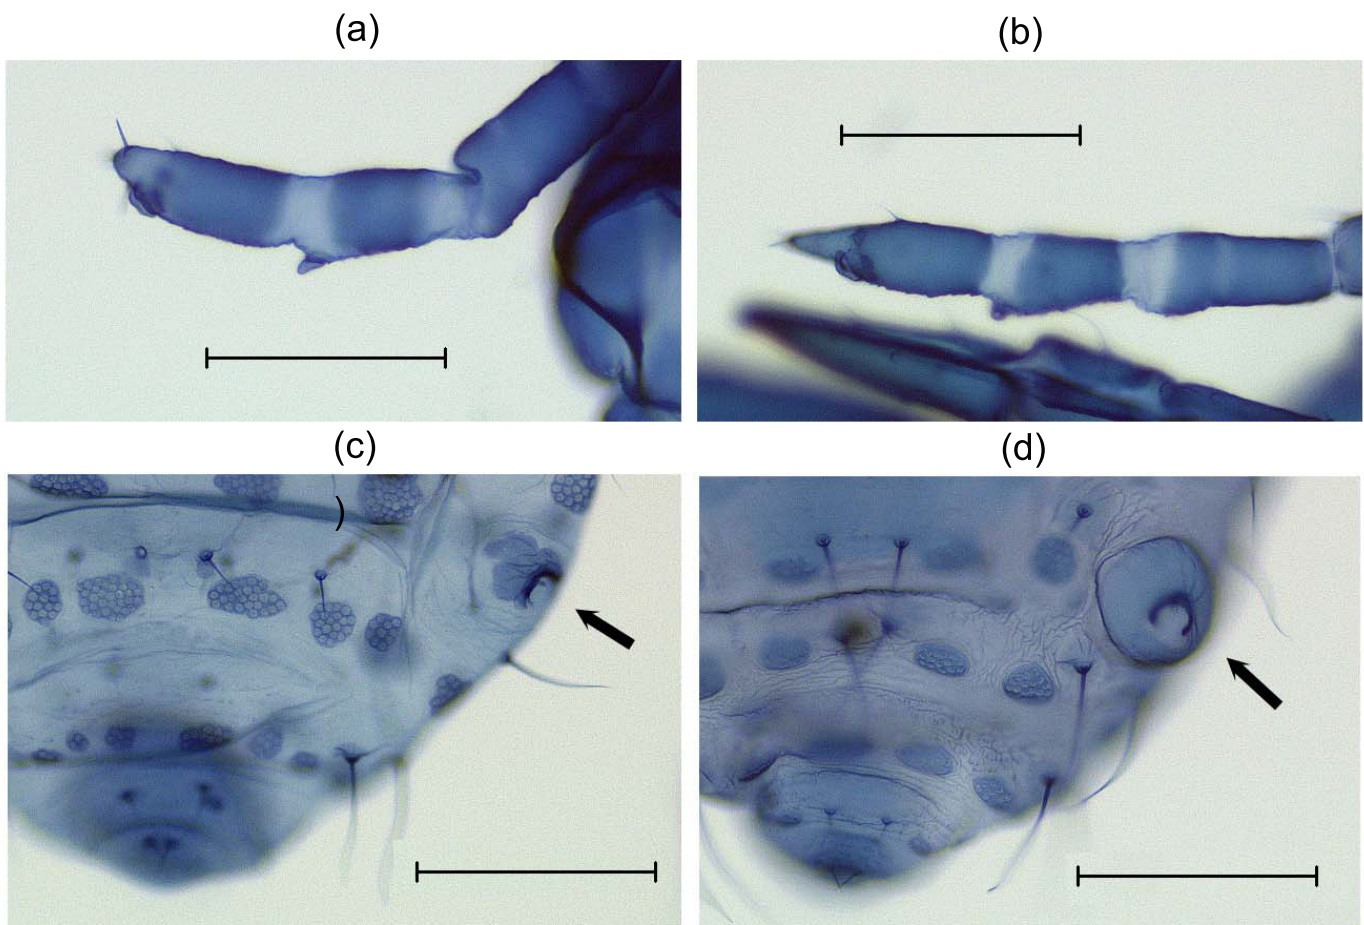

Fig. 5

bioRxiv preprint doi: <https://doi.org/10.1101/2021.05.20.443943>; this version posted May 21, 2021. The copyright holder for this preprint (which was not certified by peer review) is the author/funder, who has granted bioRxiv a license to display the preprint in perpetuity. It is made available under a [CC-BY-NC-ND 4.0 International license](#).

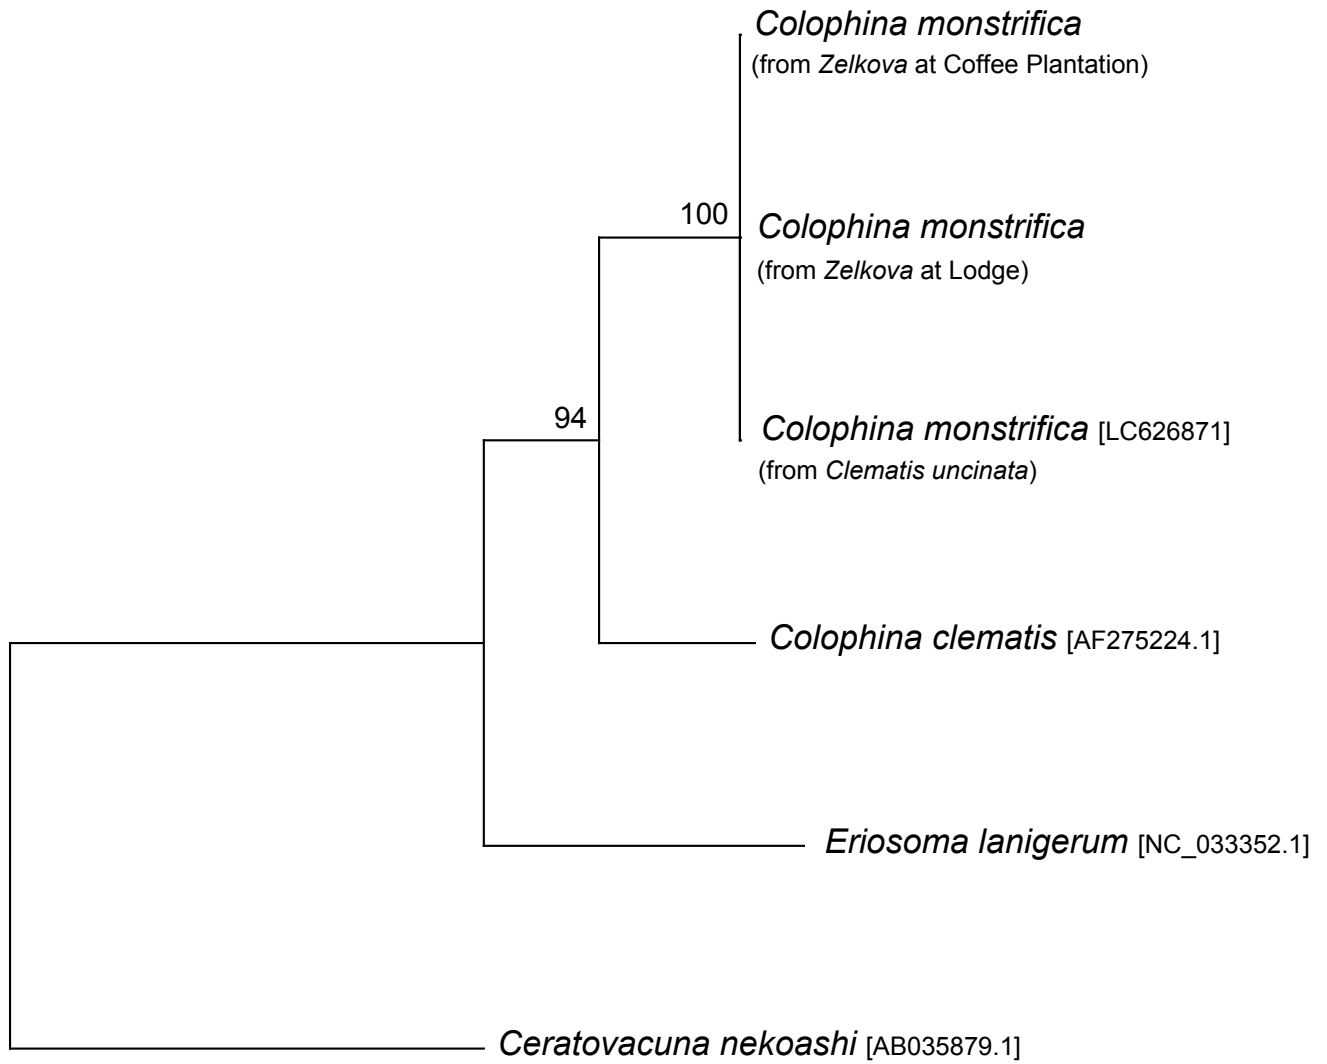

Fig. 6

bioRxiv preprint doi: <https://doi.org/10.1101/2021.05.20.443943>; this version posted May 21, 2021. The copyright holder for this preprint (which was not certified by peer review) is the author/funder, who has granted bioRxiv a license to display the preprint in perpetuity. It is made available under a [CC-BY-NC-ND 4.0 International license](#).

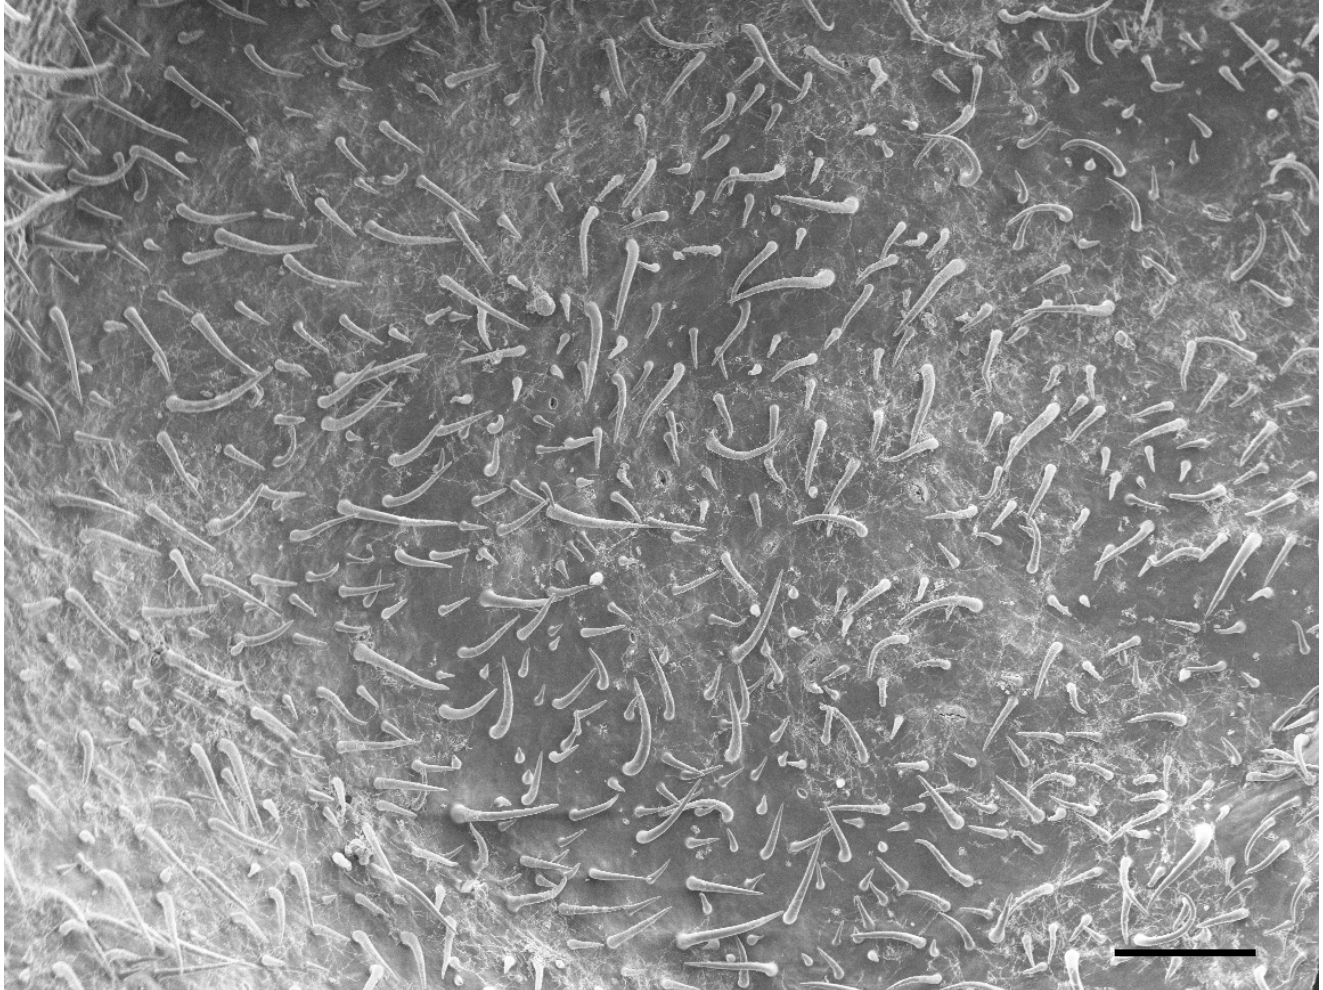

Source: https://www.biorxiv.org/content/10.1101/2021.05.20.443943v1.full.pdf
